# Supplementary material for: Measurement of the combined quantum and electrochemical capacitance of a carbon nanotube
Source: PubMed Central journal article supplement (PMC6689019; doi:10.1038/s41467-019-11589-9), 2019-08-09
Supplement: 41467_2019_11589_MOESM1_ESM.pdf [file 41467_2019_11589_MOESM1_ESM.pdf]

# Measurement of the combined quantum and electrochemical capacitance of a carbon nanotube

Jinfeng Li et al.

## Supplementary Figures:

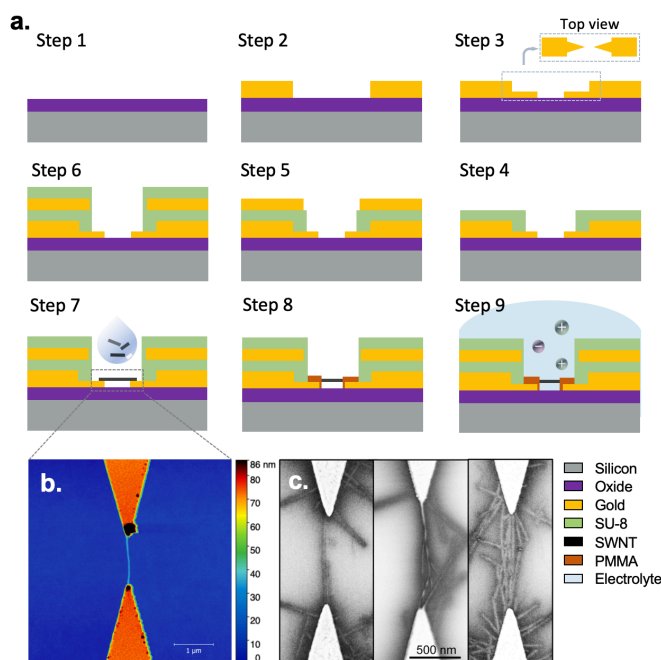

**Supplementary Figure 1: Device fabrication.** (a) Fabrication process for a SWNT FET device with the integrated shield. Step 1: A highly doped silicon wafer with a 300 nm oxide layer. Step 2: Source-drain electrodes fabrication using standard photolithography. Step 3: Fine-tip electrodes fabrication using e-beam lithography. Step 4: Dielectric layer fabrication. Step 5: Top shielding layer fabrication. Step 6: Top passivation layer fabrication. Step 7: Nanotube deposition using dielectrophoresis (DEP). Step 8: Final PMMA passivation layer with only the nanotube exposed. Step 9: Electrolyte solution brought in contact with the nanotube acting as the top-liquid gate. (b, c) Topographic images of the SWNTs imaged by AFM and SEM. The SWNTs were DEP-attached to the source-drain electrodes. Multiple amounts of SWNTs (1~100 nanotubes) between the source and drain electrodes were observed.

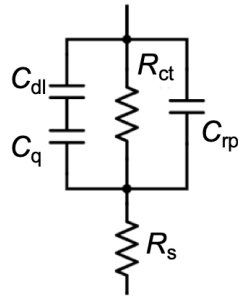

**Supplementary Figure 2: Detailed circuit between a nanotube and an electrolyte solution.**

### Supplementary Note 1: Details of $C_{\text{meas}}$ .

The measured capacitance  $C_{\text{meas}}$  contains the quantum capacitance  $C_q$  and the double layer capacitance  $C_{\text{dl}}$  in series as the main components (Supplementary Figure 2). In parallel with the capacitances, there is the charge transfer resistance  $R_{\text{ct}}$  which is much larger compared to the capacitive impedance in our measurement window and can be ignored. Also, in parallel, there is the remaining parasitic capacitance  $C_{\text{rp}}$  at non-shielded space, which is constant and can be simply subtracted as a background. Finally, the electrode contact resistance and the resistance of the electrolyte is much smaller than that of the tube-liquid interface, hence it can be ignored. Note that the double layer capacitor is not a perfect capacitor; it has a phase shift value different from  $-90^\circ$ , which can be phenomenally described as a constant phase element (CPE).<sup>1-3</sup> The phase shift phenomenon was also observed in liquid-gated graphene studies.<sup>4</sup> The ratio between the imaginary part and the real part of the measured current after the background subtracting suggests that the phase shift of the current is at the value  $\sim 70^\circ$ .

### Supplementary References:

1. Brug, G. J., van den Eeden, A. L. G., Sluyters-Rehbach, M. & Sluyters, J. H. The analysis of electrode impedances complicated by the presence of a constant phase element. *J. Electroanal. Chem.* **176**, 275–295 (1984).
2. Pajkossy, T. Impedance of rough capacitive electrodes. *J. Electroanal. Chem.* **364**, 111–125 (1994).
3. Bisquert, J., Garcia-Belmonte, G., Bueno, P., Longo, E. & Bulhões, L. O. S. Impedance of constant phase element (CPE)-blocked diffusion in film electrodes. *J. Electroanal. Chem.* **452**, 229–234 (1998).
4. Crosser, M. S., Brown, M. A., McEuen, P. L. & Minot, E. D. Determination of the thermal noise limit of graphene biotransistors. *Nano Lett.* **15**, 5404–5407 (2015).
